# Supplementary material for: PRDM1/BLIMP1 induces cancer immune evasion by modulating the USP22-SPI1-PD-L1 axis in hepatocellular carcinoma cells
Source: PubMed Central journal article supplement (PMC9744896; doi:10.1038/s41467-022-35469-x), 2022-12-12
Supplement: 41467_2022_35469_MOESM1_ESM.pdf [file 41467_2022_35469_MOESM1_ESM.pdf]

## Supplementary information

### PRDM1/BLIMP1 induces cancer immune evasion by modulating the USP22-SPI1-PD-L1 axis in hepatocellular carcinoma cells

Qing Li<sup>1,†</sup>. Liren Zhang<sup>1,†</sup>. Wenhua You<sup>2,3,†</sup>. Jiali Xu<sup>4,†</sup>. Jingjing Dai<sup>5,†</sup>. Dongxu Hua<sup>6,†</sup>. Ruizhi Zhang<sup>1</sup>. Feifan Yao<sup>1</sup>. Suiqing zhou<sup>1</sup>. Wei Huang<sup>7</sup>. Yongjiu Dai<sup>1</sup>. Yu Zhang<sup>7</sup>. Tasiken Baheti<sup>7</sup>. Xiaofeng Qian<sup>1</sup>. Liyong Pu<sup>1</sup>. Jing Xu<sup>8,\*</sup>. Yongxiang Xia<sup>1,\*</sup>. Chuanyong Zhang<sup>1,\*</sup>. Jinhai Tang<sup>9,\*</sup>. Xuehao Wang<sup>1,\*</sup>

<sup>1</sup>Hepatobiliary Center, The First Affiliated Hospital of Nanjing Medical University, Key Laboratory of Liver Transplantation, Chinese Academy of Medical Sciences, NHC Key Laboratory of Living Donor Liver Transplantation (Nanjing Medical University), Nanjing, Jiangsu Province, China.

<sup>2</sup>School of Chemistry and Chemical Engineering, Southeast University, Nanjing, Jiangsu Province, China.

<sup>3</sup>Department of Immunology, Key Laboratory of Immune Microenvironment and Disease, Nanjing Medical University, Jiangsu Province, China.

<sup>4</sup>Department of Anesthesiology and Perioperative Medicine, The First Affiliated Hospital of Nanjing Medical University, Nanjing, Jiangsu Province, China.

<sup>5</sup>Department of Infectious Diseases, The First Affiliated Hospital of Nanjing Medical University, Nanjing, Jiangsu Province, China.

<sup>6</sup>The First School of Clinical Medicine, Nanjing Medical University, Nanjing, China.

<sup>7</sup>Department of General Surgery, The Friendship Hospital of Ili Kazakh Autonomous Prefecture; Ili & Jiangsu Joint Institute of Health, Ili, China.

<sup>8</sup>Department of Oncology, The First Affiliated Hospital of Nanjing Medical University, Nanjing, Jiangsu Province, China.

<sup>9</sup>Department of General Surgery, The First Affiliated Hospital of Nanjing Medical University, Nanjing, Jiangsu Province, China.

<sup>†</sup>These authors contributed equally to this work.

\*Correspondence to: Xuehao Wang, email: [wangxh@njmu.edu.cn](mailto:wangxh@njmu.edu.cn)

Jinhai Tang, email: [jhtang@njmu.edu.cn](mailto:jhtang@njmu.edu.cn)

Chuanyong Zhang, email: [zcy13951673178@163.com](mailto:zcy13951673178@163.com)

Yongxiang Xia, **email:** [yx\\_xia@njmu.edu.cn](mailto:yx_xia@njmu.edu.cn)

Jing Xu, **email:** [xujing7901@jsph.org.cn](mailto:xujing7901@jsph.org.cn)

## Supplementary Figure 1

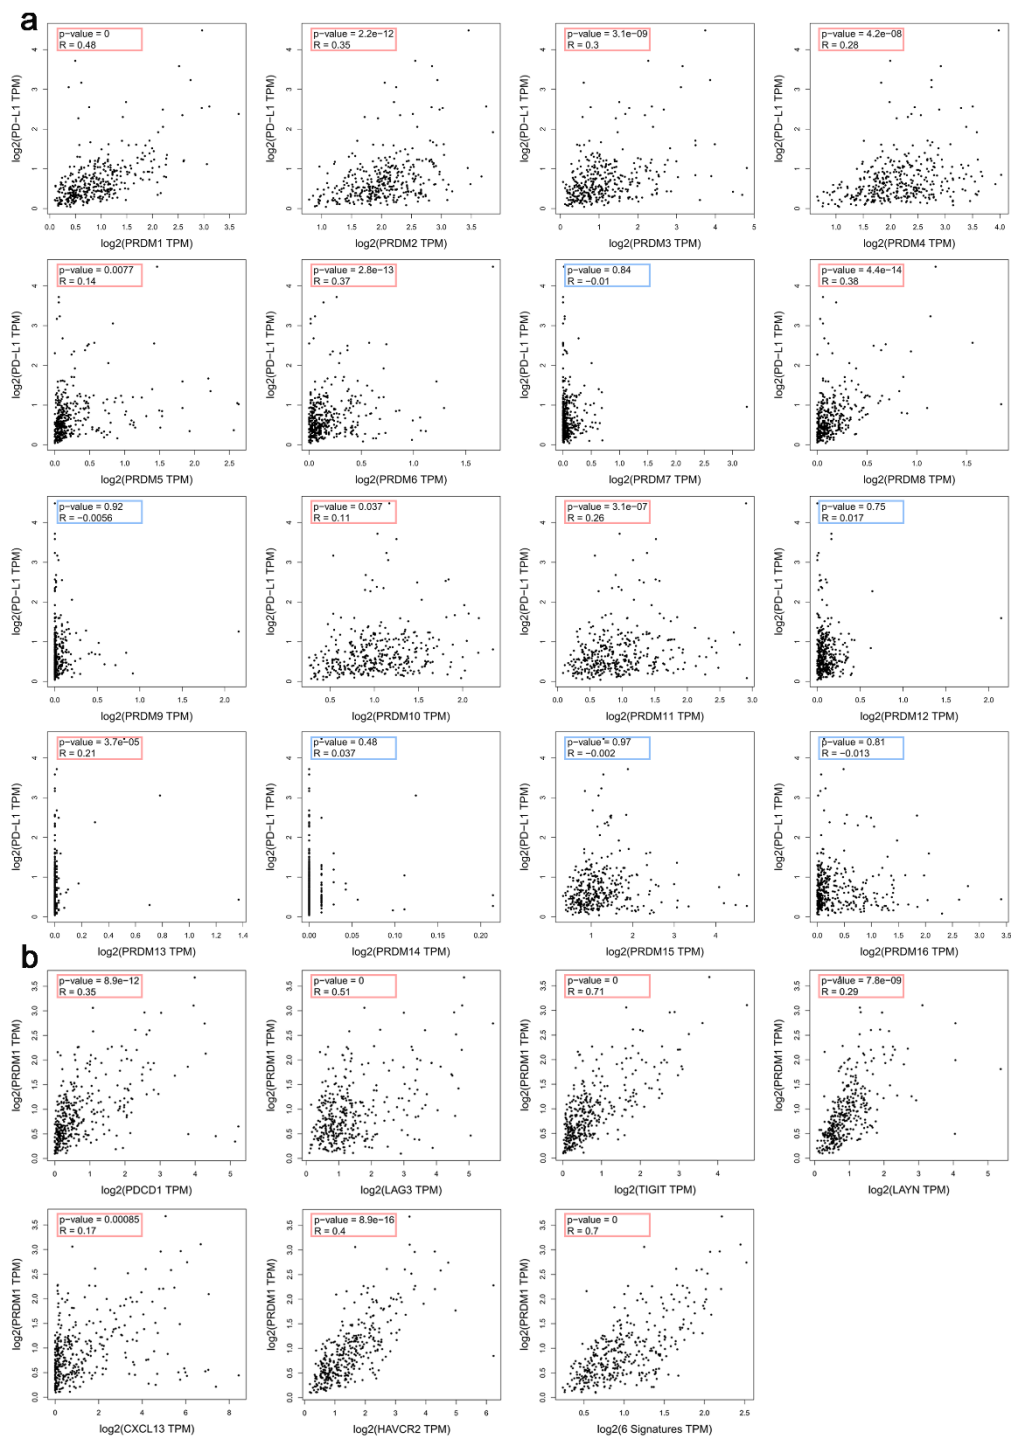

**Supplementary Figure 1** *PRDM1* is a regulator of *PD-L1* expression in the GEPIA database. **a** The GEPIA database revealed the association of the *PRDM* family with *PD-L1*. **b** The GEPIA database revealed the association of *PRDM1* with *PDCD1*, *LAG3*, *TIGIT*, *LAYN*, *CXCL13*, *HAVCR2*, and above 6 T cell exhaustion markers. n = 369 patients. Statistical tests were two-sided. P value was determined by Pearson correlation analysis.

## Supplementary Figure 2

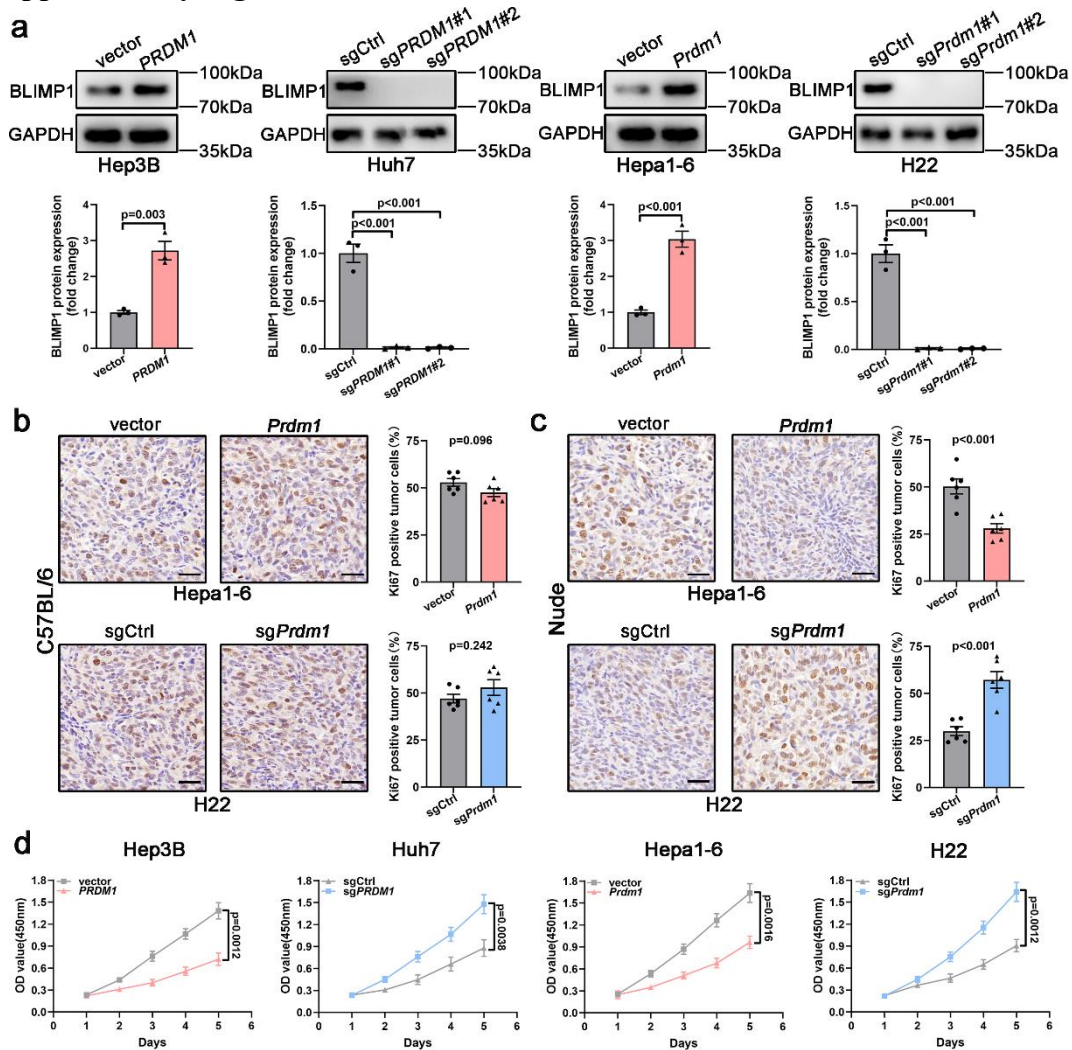

### Supplementary Figure 2 *PRDM1* overexpression inhibits cell-intrinsic cell growth.

**a** Western blot validation of BLIMP1 expression in the indicated HCC cells. Representative of  $n = 3$  independent biological replicates. **b** Immunohistochemical analysis of Ki-67 expression in subcutaneous tumors collected from Hepa1-6/H22-bearing C57BL/6 mice (left) ( $n = 6$  mice per group). Scale bar:  $100 \mu\text{m}$ . The quantitative ratio of Ki-67 positive tumor cells is shown on the right. Data presented as mean  $\pm$  SEM. **c** Immunohistochemical analysis of Ki-67 expression in subcutaneous tumors collected from Hepa1-6/H22-bearing BALB/c nude mice (left) ( $n = 6$  mice per group). Scale bar:  $100 \mu\text{m}$ . The quantitative ratio of Ki-67 positive tumor cells is shown on the right. Data presented as mean  $\pm$  SEM. **d** CCK8 assays in the indicated HCC cells. Data presented as mean  $\pm$  SEM ( $n = 3$  independent biological replicates). P value was determined by unpaired two-sided Student's t test with no correction for multiple comparison. The source data are provided as a Source data file.

### Supplementary Figure 3

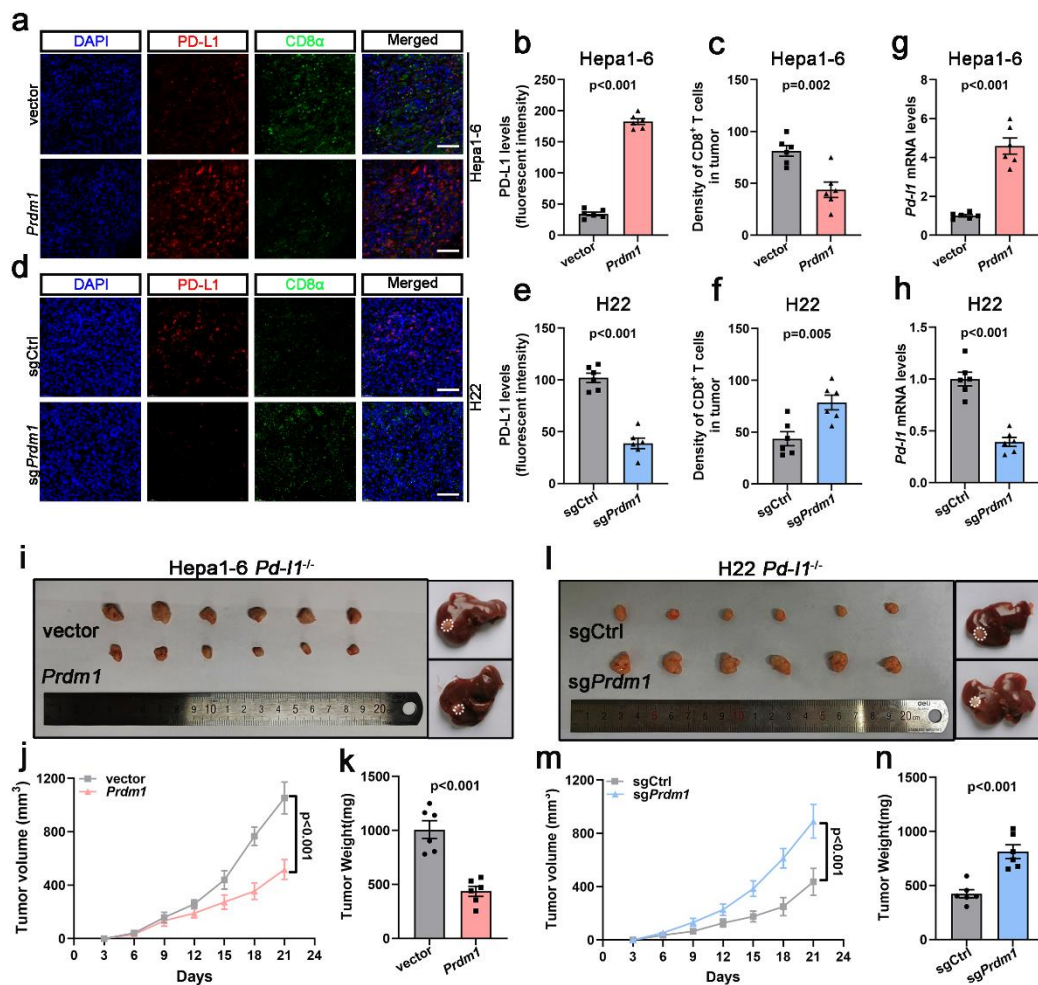

**Supplementary Figure 3** *Prdm1*-mediated tumor immune escape is dependent on **PD-L1**. **a-f** IF staining of PD-L1 and CD8 $\alpha$  in subcutaneous tumors of the indicated groups and quantification of fluorescence intensity. Scale bars, 100  $\mu$ m. Data presented as mean  $\pm$  SEM.  $n = 6$  mice per group. **g-h** *Pd-11* mRNA levels in the subcutaneous tumors of indicated groups. Data presented as mean  $\pm$  SEM.  $n = 6$  mice per group. **i** Representative subcutaneous tumors (left)/orthotopic transplantation tumors (right) collected from Hepa1-6-bearing C57BL/6 mice. **j** Tumor proliferation curves of subcutaneous xenografts in Hepa1-6-bearing C57BL/6 mice. Data presented as mean  $\pm$  SEM.  $n = 6$  mice per group. **k** Tumor weight of subcutaneous tumors in Hepa1-6-bearing C57BL/6 mice. Data presented as mean  $\pm$  SEM.  $n = 6$  mice per group. **l** Representative subcutaneous tumors (left)/orthotopic transplantation tumors (right) collected from H22-bearing C57BL/6 mice. **m** Tumor proliferation curves of subcutaneous xenografts in H22-bearing C57BL/6 mice. Data presented as mean  $\pm$  SEM.  $n = 6$  mice per group. **n** Tumor weight of subcutaneous tumors in H22-bearing C57BL/6 mice. Data presented as mean  $\pm$  SEM.  $n = 6$  mice per group. P value was

determined by unpaired two-sided Student's t test. The source data are provided as a Source data file.

## Supplementary Figure 4

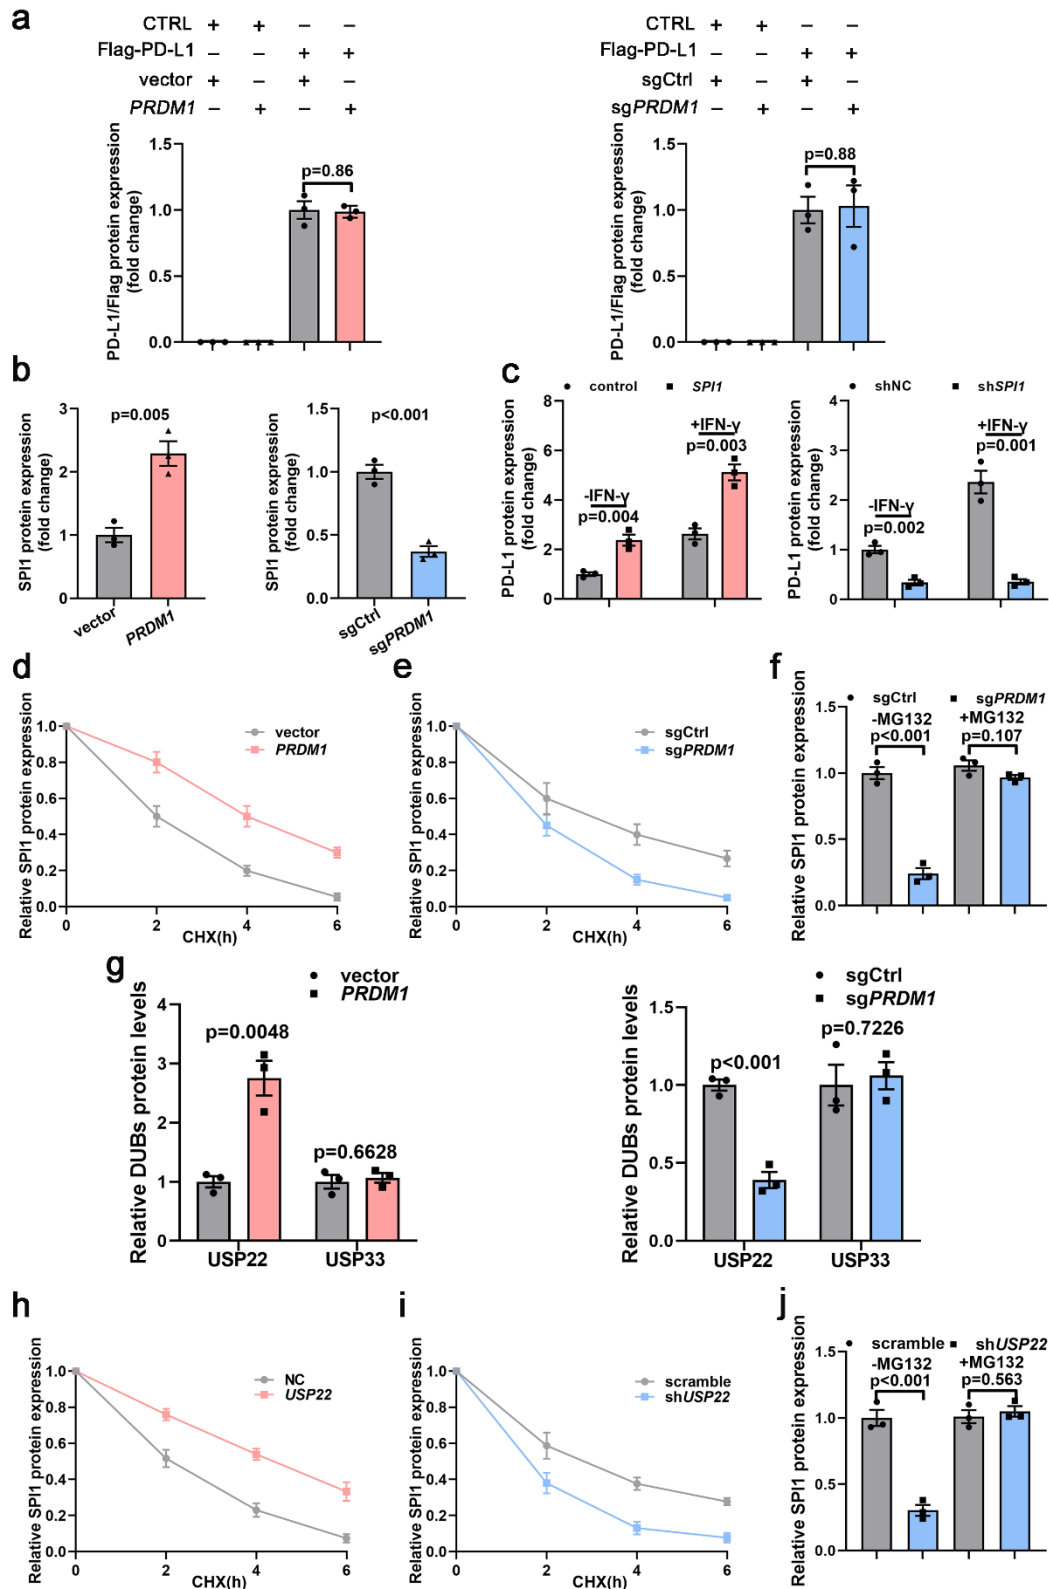

**Supplementary Figure 4 Quantitative analyses of the western blot results, related to Figure 3 and Figure 4. a** Quantitative analyses of the western blot results in Fig. 3a. Representative of  $n = 3$  independent biological replicates. **b** Quantitative analyses of the western blot results in Fig. 3d. Representative of  $n = 3$  independent biological

replicates. **c** Quantitative analyses of the western blot results in Fig. 3e. Representative of n = 3 independent biological replicates. **d-e** Quantitative analyses of the western blot results in Fig. 4a-b, respectively. Representative of n = 3 independent biological replicates. **f** Quantitative analyses of the western blot results in Fig. 4c. Representative of n = 3 independent biological replicates. **g** Quantitative analyses of the western blot results in Fig. 4g. Representative of n = 3 independent biological replicates. **h-i** Quantitative analyses of the western blot results in Fig. 4i-j, respectively. Representative of n = 3 independent biological replicates. **j** Quantitative analyses of the western blot results in Fig. 4k. Representative of n = 3 independent biological replicates. P value was determined by unpaired two-sided Student's t test. The source data are provided as a Source data file.



## Supplementary Figure 5

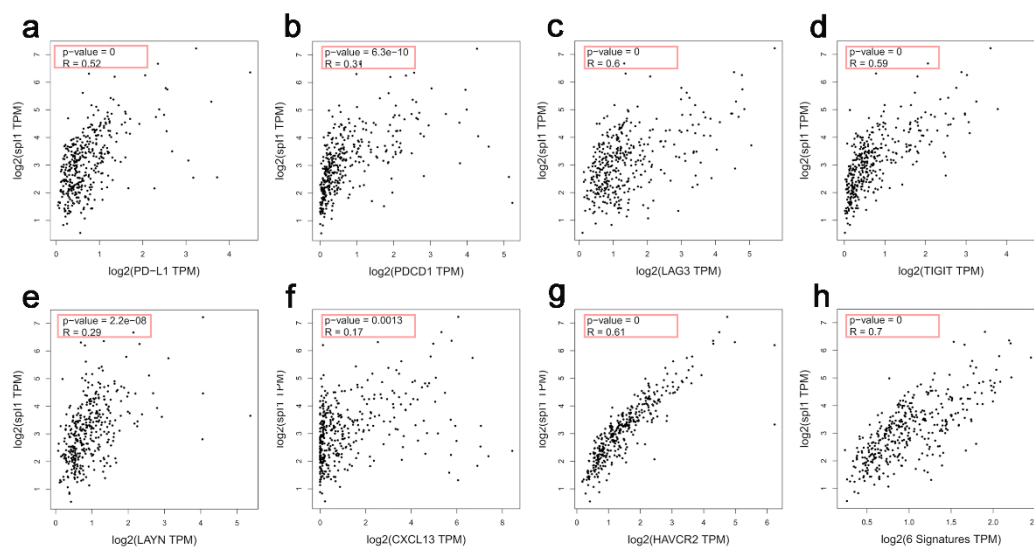

**Supplementary Figure 5 *SPI1* is a regulator of *PD-L1* expression in the GEPIA database.** **a-g** The GEPIA database revealed the association of *SPI1* with *PD-L1* (a), *PDCD1* (b), *LAG3* (c), *TIGIT* (d), *LAYN* (e), *CXCL13* (f), and *HAVCR2* (g). **h** The GEPIA database revealed the association of *SPI1* with the above 6 T cell exhaustion markers (*PDCD1*, *LAG3*, *TIGIT*, *LAYN*, *CXCL13*, and *HAVCR2*). n = 369 patients. Statistical tests were two-sided. P value was determined by Pearson correlation analysis.

## Supplementary Figure 6

**a**

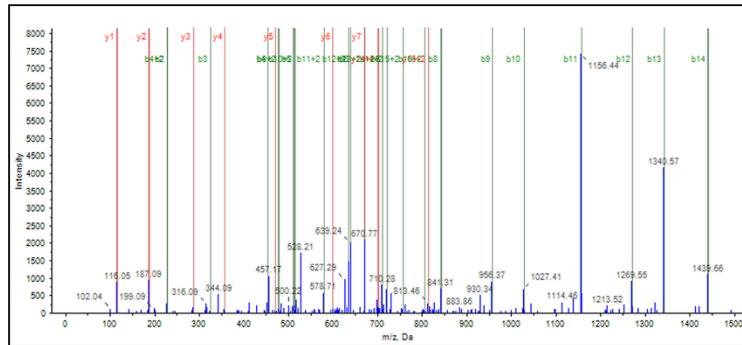

**b**

Fragmentation Evidence

| PEPEGEAMDAELAVAP |           |          |           |          |
|------------------|-----------|----------|-----------|----------|
| Residue          | b         | b+2      | y         | y+2      |
| P                | 98.0600   | 49.6337  | 1625.7363 | 813.3718 |
| E                | 227.1026  | 114.0550 | 1528.6836 | 764.8454 |
| P                | 324.1554  | 162.5813 | 1399.6410 | 700.3241 |
| E                | 453.1980  | 227.1026 | 1302.5882 | 651.7977 |
| G                | 510.2195  | 255.6134 | 1173.5456 | 587.2764 |
| E                | 639.2620  | 320.1347 | 1116.5242 | 558.7657 |
| A                | 710.2992  | 355.6532 | 987.4816  | 494.2444 |
| M                | 841.3396  | 421.1735 | 916.4444  | 458.7259 |
| D                | 956.3666  | 478.6869 | 795.4040  | 393.2056 |
| A                | 1027.4037 | 514.2055 | 670.3770  | 335.6921 |
| E                | 1156.4463 | 578.7268 | 599.3399  | 300.1736 |
| L                | 1289.5304 | 635.2688 | 470.2973  | 235.6523 |
| A                | 1340.5675 | 670.7874 | 357.2132  | 179.1103 |
| V                | 1439.6359 | 720.3216 | 286.1761  | 143.5917 |
| A                | 1510.6730 | 755.9401 | 197.1077  | 94.0575  |
| P                | 1607.7258 | 804.3665 | 116.0706  | 58.5389  |

**Supplementary Figure 6 USP22 interacts with SPI1. a** Immunoprecipitation/mass spectrum (IP/MS) analysis was utilized to validate USP22 as the interacting protein of SPI1. **b** Fragmentation evidence for USP22.

## Supplementary Figure 7

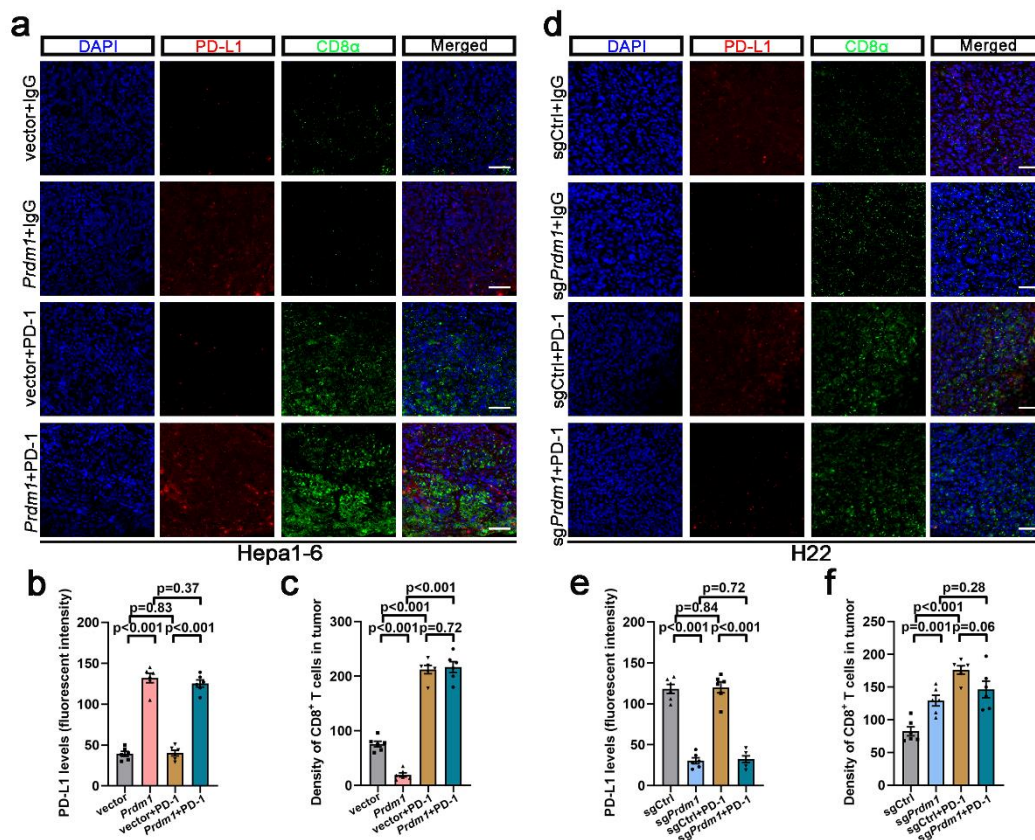

**Supplementary Figure 7 Synergistic effect of *Prdm1* overexpression and PD-1 mAb dramatically augmented the infiltrated CD8<sup>+</sup> T cells. a-c** Immunofluorescence staining of PD-L1 and CD8α (a) and quantification of fluorescence intensity (b and c) in Hepa1-6 xenografts. Scale bars, 100 μm. Data presented as mean ± SEM. n = 6 mice per group. **d-f** Immunofluorescence staining of PD-L1 and CD8α (d) and quantification of the fluorescence intensity (e and f) in H22 xenografts. Scale bars, 100 μm. Data presented as mean ± SEM. n = 6 mice per group. P value was determined by unpaired two-sided Student's t test with no correction for multiple comparison. The source data are provided as a Source data file.

## Supplementary Figure 8

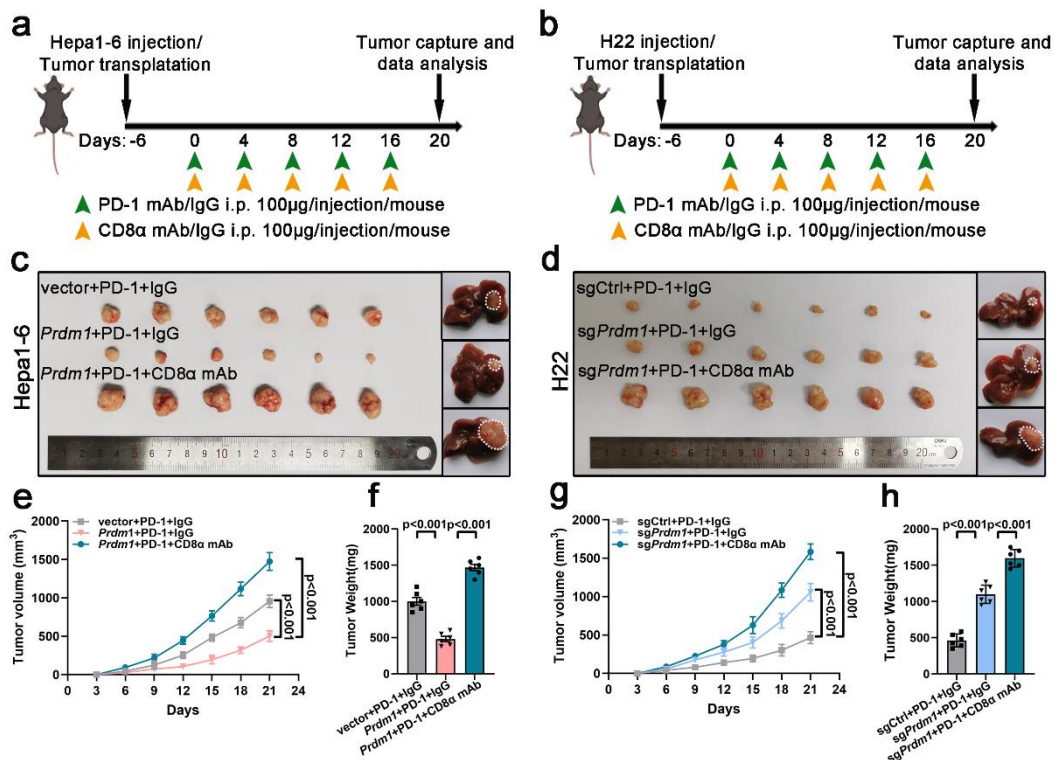

**Supplementary Figure 8 CD8<sup>+</sup> T cells are essential for the synergistic effect of cotreatment with *Prdm1* overexpression and PD-1 mAb.** **a, b** Schematic view of the treatment plan in subcutaneous and orthotopic tumors. **c, d** Representative xenograft tumors (left) or orthotopic tumors (right) obtained after euthanizing the mice. **e, f** Tumor growth curves (**e**) and tumor weights (**f**) of Hepa1-6-bearing C57BL/6 mice. Data presented as mean  $\pm$  SEM.  $n = 6$  mice per group. **g-h** Tumor growth curves (**g**) and tumor weights (**h**) of H22-bearing C57BL/6 mice. Data presented as mean  $\pm$  SEM.  $n = 6$  mice per group. P value was determined by unpaired two-sided Student's t test with no correction for multiple comparison. Schematic diagrams (**a** and **b**) were created with BioRender.com. The source data are provided as a Source data file.

## Supplementary Figure 9

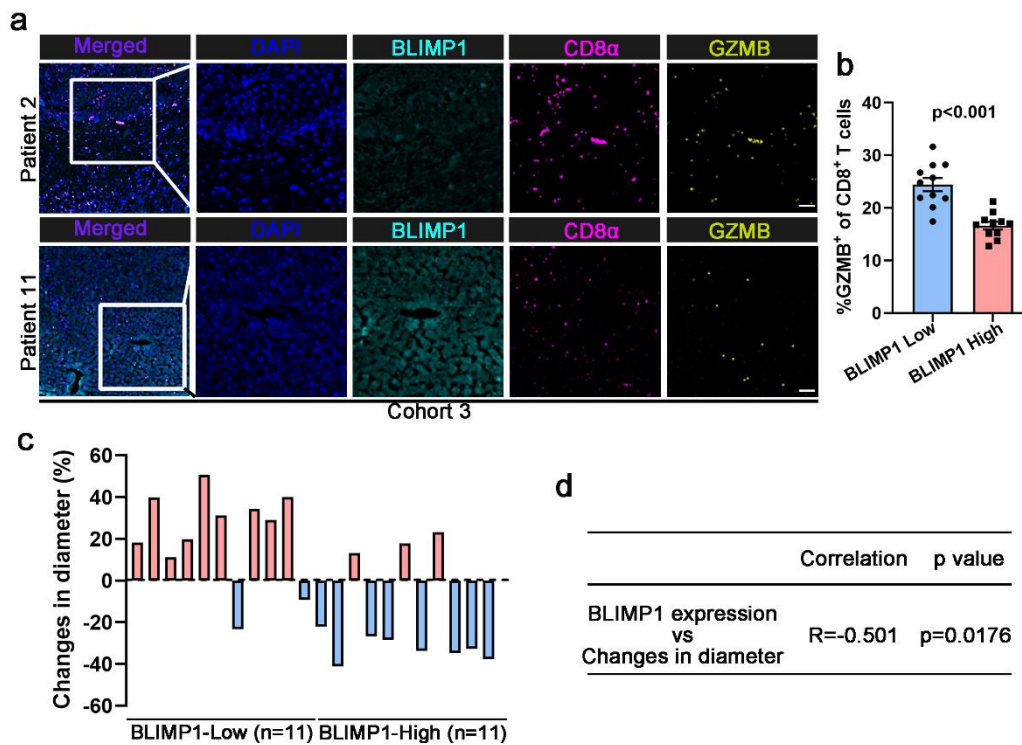

**Supplementary Figure 9 *PRDM1*/BLIMP1 overexpression potentiates T-cell exhaustion.** **a** Multi-color immunohistochemistry using HCC biopsies before PD-1 mAb-based therapies. Scale bars, 100  $\mu$ m. **b** The quantitative ratio of GZMB<sup>+</sup>CD8<sup>+</sup> T cells. Data presented as mean  $\pm$  SEM. n = 22 patients. **c** The changes in tumor diameter for patients, where those with increased tumor diameter are colored by red and those with decreased tumor diameter are colored by blue. n = 22 patients. **d** Quantitative correlation between the changes in tumor diameter and BLIMP1 expression levels. P value was determined by unpaired two-sided Student's t test (**b**) and Pearson correlation analysis (**d**). The source data are provided as a Source data file.

## Supplementary Figure 10

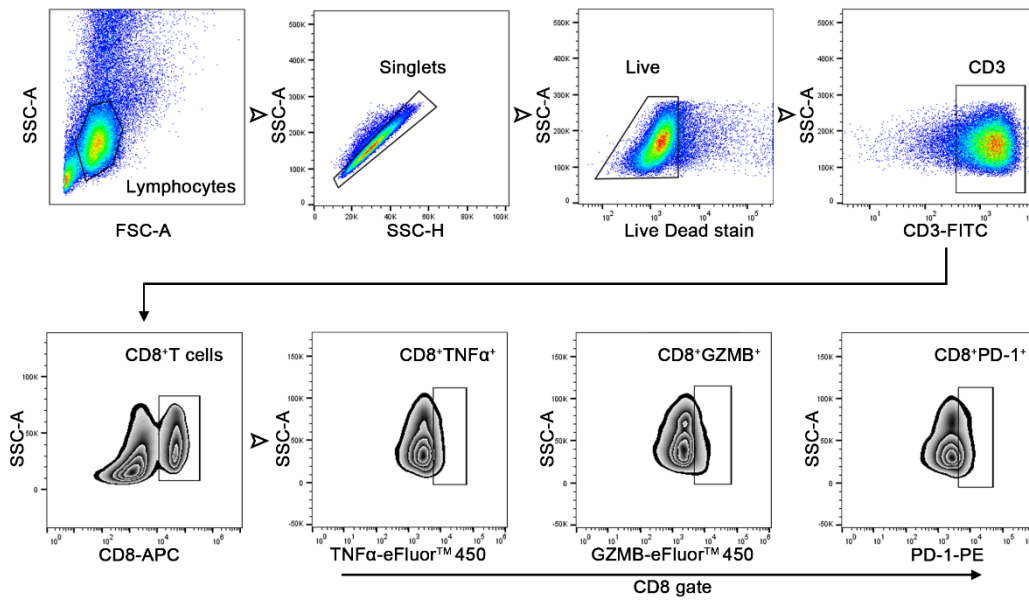

**Supplementary Figure 10** Gating strategies used for flow cytometry staining. Gating strategy used to sort CD8<sup>+</sup> T cells, CD8<sup>+</sup>TNFα<sup>+</sup> cells, CD8<sup>+</sup>GZMB<sup>+</sup> cells, and CD8<sup>+</sup> PD1<sup>+</sup> cells and for flow cytometry staining (Figure 1f, g, and k; Figure 2g and h; Figure 6i and j).

**Supplementary Table 1: DUB Family**

| <b>Entrez Gene ID</b> | <b>Current Symbol</b> | <b>Entrez Gene ID</b> | <b>Current Symbol</b> | <b>Entrez Gene ID</b> | <b>Current Symbol</b> |
|-----------------------|-----------------------|-----------------------|-----------------------|-----------------------|-----------------------|
| 1540                  | CYLD                  | 10869                 | USP19                 | 59343                 | SENP2                 |
| 4287                  | ATXN3                 | 10980                 | COPS6                 | 64854                 | USP46                 |
| 5713                  | PSMD7                 | 10987                 | COPS5                 | 78990                 | OTUB2                 |
| 7128                  | TNFAIP3               | 11274                 | USP18                 | 79101                 | JOSD3                 |
| 7345                  | UCHL1                 | 23032                 | USP33                 | 79184                 | BRCC3                 |
| 7347                  | UCHL3                 | 23192                 | ATG4B                 | 80124                 | VCPIP1                |
| 7375                  | USP4                  | 23326                 | USP22                 | 83844                 | USP26                 |
| 7398                  | USP1                  | 23358                 | USP24                 | 84101                 | USP44                 |
| 7874                  | USP7                  | 25862                 | USP49                 | 84132                 | USP42                 |
| 8078                  | USP5                  | 26054                 | SENP6                 | 84196                 | USP48                 |
| 8237                  | USP11                 | 26168                 | SENP3                 | 84640                 | USP38                 |
| 8239                  | USP9X                 | 27005                 | USP21                 | 84669                 | USP32                 |
| 8287                  | USP9Y                 | 29761                 | USP25                 | 84749                 | USP30                 |
| 8314                  | BAP1                  | 29843                 | SENP1                 | 84954                 | MPND                  |
| 8665                  | EIF3S5                | 51377                 | UCHL5                 | 85015                 | USP45                 |
| 8667                  | EIF3S3                | 51633                 | OTUD6B                | 92552                 | ATXN3L                |
| 8975                  | USP13                 | 54726                 | OTUD4                 | 114803                | MYSM1                 |
| 9097                  | USP14                 | 54764                 | ZRANB1                | 115201                | ATG4A                 |
| 9098                  | USP6                  | 55031                 | USP47                 | 124739                | USP43                 |
| 9099                  | USP2                  | 55230                 | USP40                 | 126119                | JOSD2                 |
| 9100                  | USP10                 | 55432                 | YOD1                  | 139562                | OTUD6A                |
| 9101                  | USP8                  | 55593                 | OTUD5                 | 158880                | USP51                 |
| 9736                  | USP34                 | 55611                 | OTUB1                 | 159195                | USP54                 |
| 9924                  | USP52                 | 56957                 | OTUD7B                | 161725                | OTUD7A                |
| 9929                  | JOSD1                 | 57097                 | PARP11                | 205564                | SENP5                 |
| 9958                  | USP15                 | 57337                 | SENP7                 | 219333                | USP12                 |
| 9960                  | USP3                  | 57478                 | USP31                 | 220213                | OTUD1                 |
| 10208                 | USPL1                 | 57558                 | USP35                 | 220594                | LOC220594             |
| 10213                 | PSMD14                | 57559                 | STAMBPL1              | 373509                | USP50                 |
| 10600                 | USP16                 | 57602                 | USP36                 | 373856                | USP41                 |
| 10617                 | STAMPB                | 57646                 | USP28                 | 377630                | DUB3                  |
| 10713                 | USP39                 | 57663                 | USP29                 | 645836                | LOC645836             |
| 10868                 | USP20                 | 57695                 | USP37                 |                       |                       |

**Supplementary Table 2: General Description of Patients with HCC from  
Nanjing Medical University**

| <b>Characteristics</b>  | <b>Cohort1</b> | <b>Cohort2</b> | <b>Cohort3</b> |
|-------------------------|----------------|----------------|----------------|
| <b>No. of patients</b>  | 40             | 90             | 22             |
| <b>Age</b>              |                |                |                |
| ≤60                     | 19 (47.5%)     | 34 (37.8%)     | 18 (81.8%)     |
| >60                     | 21 (52.5%)     | 56 (62.2%)     | 4 (18.2%)      |
| <b>Gender</b>           |                |                |                |
| Male                    | 30 (75.0%)     | 75 (83.3%)     | 16 (72.7%)     |
| Female                  | 10 (25.0%)     | 15 (16.7%)     | 6 (27.3%)      |
| <b>Cirrhosis status</b> |                |                |                |
| Yes                     | 34 (85.0%)     | 79 (87.8%)     | 18 (81.8%)     |
| No                      | 6 (15.0%)      | 11 (12.2%)     | 4 (18.2%)      |
| <b>HBs Antigen</b>      |                |                |                |
| Yes                     | 36 (90.0%)     | 78 (86.7%)     | 19 (86.4%)     |
| No                      | 4 (10.0%)      | 12 (13.3%)     | 3 (13.6%)      |
| <b>AFP</b>              |                |                |                |
| Negative                | 10 (25.0%)     | 19 (21.1%)     | 5 (22.7%)      |
| Positive                | 30 (75.0%)     | 71 (78.9%)     | 17 (77.3%)     |
| <b>Tumor Stage</b>      |                |                |                |
| I                       | 17 (42.5%)     | 35 (38.9%)     | 0 (0%)         |
| II                      | 8 (20.0%)      | 26 (28.9%)     | 6 (27.3%)      |
| III                     | 11 (27.5%)     | 21 (23.3%)     | 14 (63.6%)     |
| IV                      | 4 (10.0%)      | 8 (8.9%)       | 2 (9.1%)       |



**Supplementary Table 3: Sequences of oligonucleotides for sgRNA/shRNA**

| Gene           | Species | Sequence (5'-3')                         |
|----------------|---------|------------------------------------------|
| <i>sgPRDM1</i> | Human   | <i>sgPRDM1</i> #1: GAAGTGGTGAAGCTCCCCTC  |
|                |         | <i>sgPRDM1</i> #2: GCAGCCAGGTTTTGCTCCCG  |
| <i>sgPrdm1</i> | mouse   | <i>sgPrdm1</i> #1: ACACGCTTTGGACCCCTCAT  |
|                |         | <i>sgPrdm1</i> #2: GAAGTGGTGGAACTCCTCTC  |
| <i>shUSP22</i> | Human   | <i>shUSP22</i> : TCGAAGAGTGGTAAGGTTACACA |
| <i>shSPII</i>  | Human   | <i>shSPII</i> : AGTCCCAGTAATGGTCGCTAT    |

**Supplementary Table 4: Primers sequences used for real-time PCR**

| Gene  | Species | Sequence (5'-3')                                                 |
|-------|---------|------------------------------------------------------------------|
| PD-L1 | Human   | Forward: TGGCATTGCTGAACGCATTT<br>Reverse: TGCAGCCAGGTCTAATTGTTTT |
| USP22 | Human   | Forward: GTGGACAACCTGGAAGCAGAAC<br>Reverse: AGGAATGCAGCCTGTTGAGG |
| USP33 | Human   | Forward: TCGGCAAGCCCTCCTAAATC<br>Reverse: TTGCCAGGAATTGGCAAGGA   |
| SPI1  | Human   | Forward: ATGGAAGGGTTTCCCCTCGT<br>Reverse: CTGGAGCTCCGTGAAGTTGT   |

**Supplementary Table 5: Primers sequences used for ChIP**

| Gene                            | Species | Sequence (5'-3')                                                    |
|---------------------------------|---------|---------------------------------------------------------------------|
| SPI1/PD-L1 binding site 1       | Human   | Forward: AACTTGTTGTACATGTGTGTGTCA<br>Reverse: CCCGAAGTTGGGTGACTTCC  |
| SPI1/PD-L1 binding site 2       | Human   | Forward: ACTTCGGGAACCTTTGGGAAGTC<br>Reverse: AGGCTGACACTGCCTTGATTT  |
| SPI1/PD-L1 binding site 3       | Human   | Forward: AGCCTTAATCCTTAGGGTGGC<br>Reverse: AAGAACTTCCCATCCCGAGC     |
| SPI1/PD-L1 binding site 4       | Human   | Forward: GAGGAAGTCACAGAATCCACGA<br>Reverse: AAAGTCAGCAGCAGACCCAT    |
| SPI1/PD-L1 negative control#1   | Human   | Forward: TTGGGGCCAAAGAGAACTCC<br>Reverse: TTATCTGGGAAATTATTGAGGCTGA |
| SPI1/PD-L1 negative control#2   | Human   | Forward: CTAGAAGTTCAGCGCGGGAT<br>Reverse: TGAATGGGCCCAAGATGACA      |
| BLIMP1/USP22 binding site       | Human   | Forward: TGAGCGAGCATCAGACATGG<br>Reverse: GACAAATTGCCGAGCACAGG      |
| BLIMP1/USP22 negative control#1 | Human   | Forward: AGGGCTTCACCGGGTAATTC<br>Reverse: TACTACAGCCGCAAGTTCCC      |
| BLIMP1/USP22 negative control#2 | Human   | Forward: ATGTGAAGTGTCAGGCGTGT<br>Reverse: CTGATAGTGAGGGCCAACCC      |
